# Supplementary material
Source: PubMed Central journal article supplement (PMC4920308)
Supplement: rspb20160181supp1.pdf [file rspb20160181supp1.pdf]

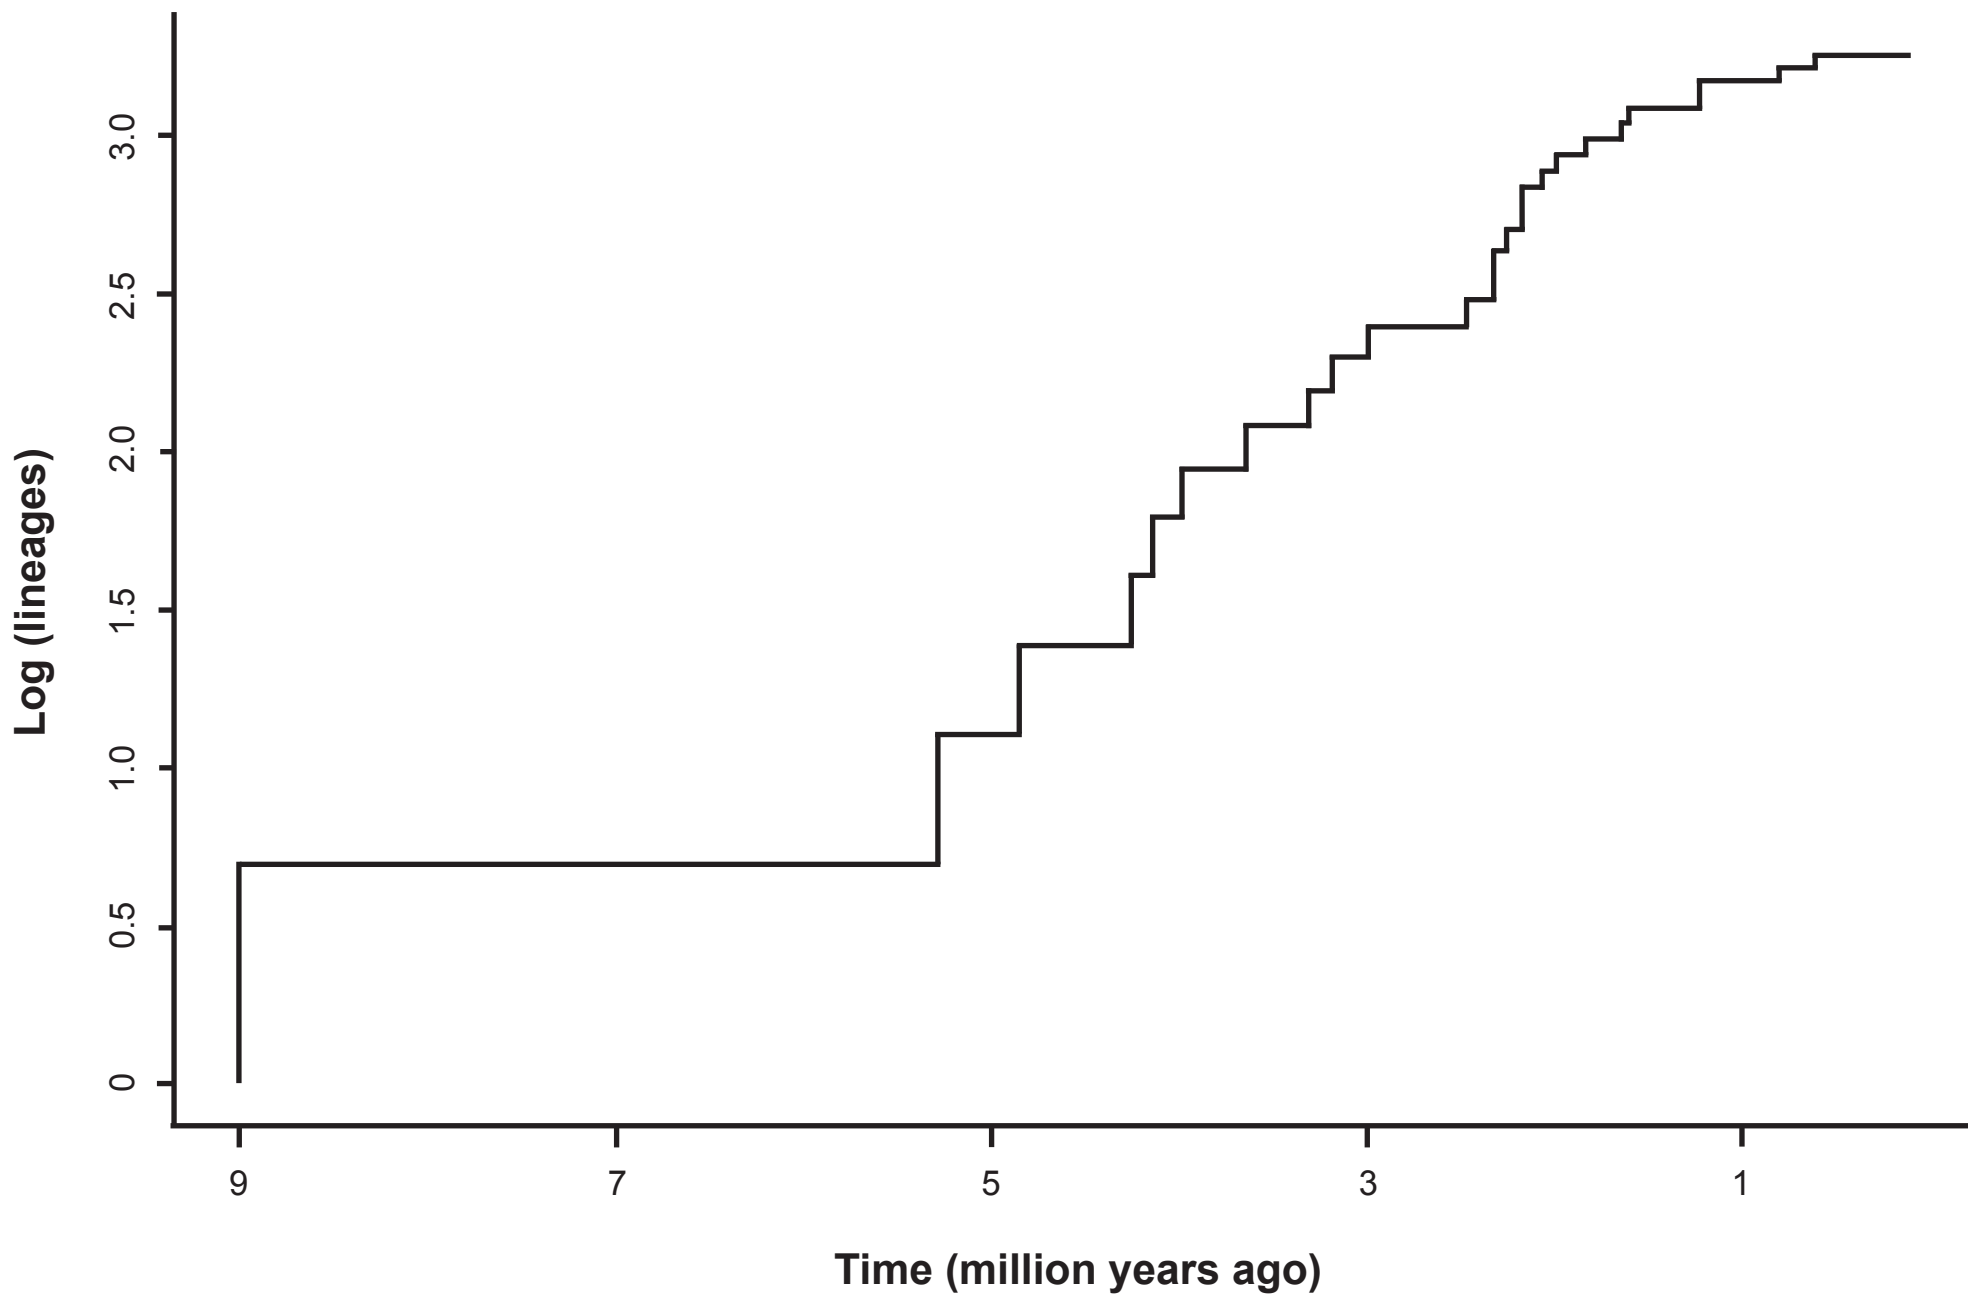

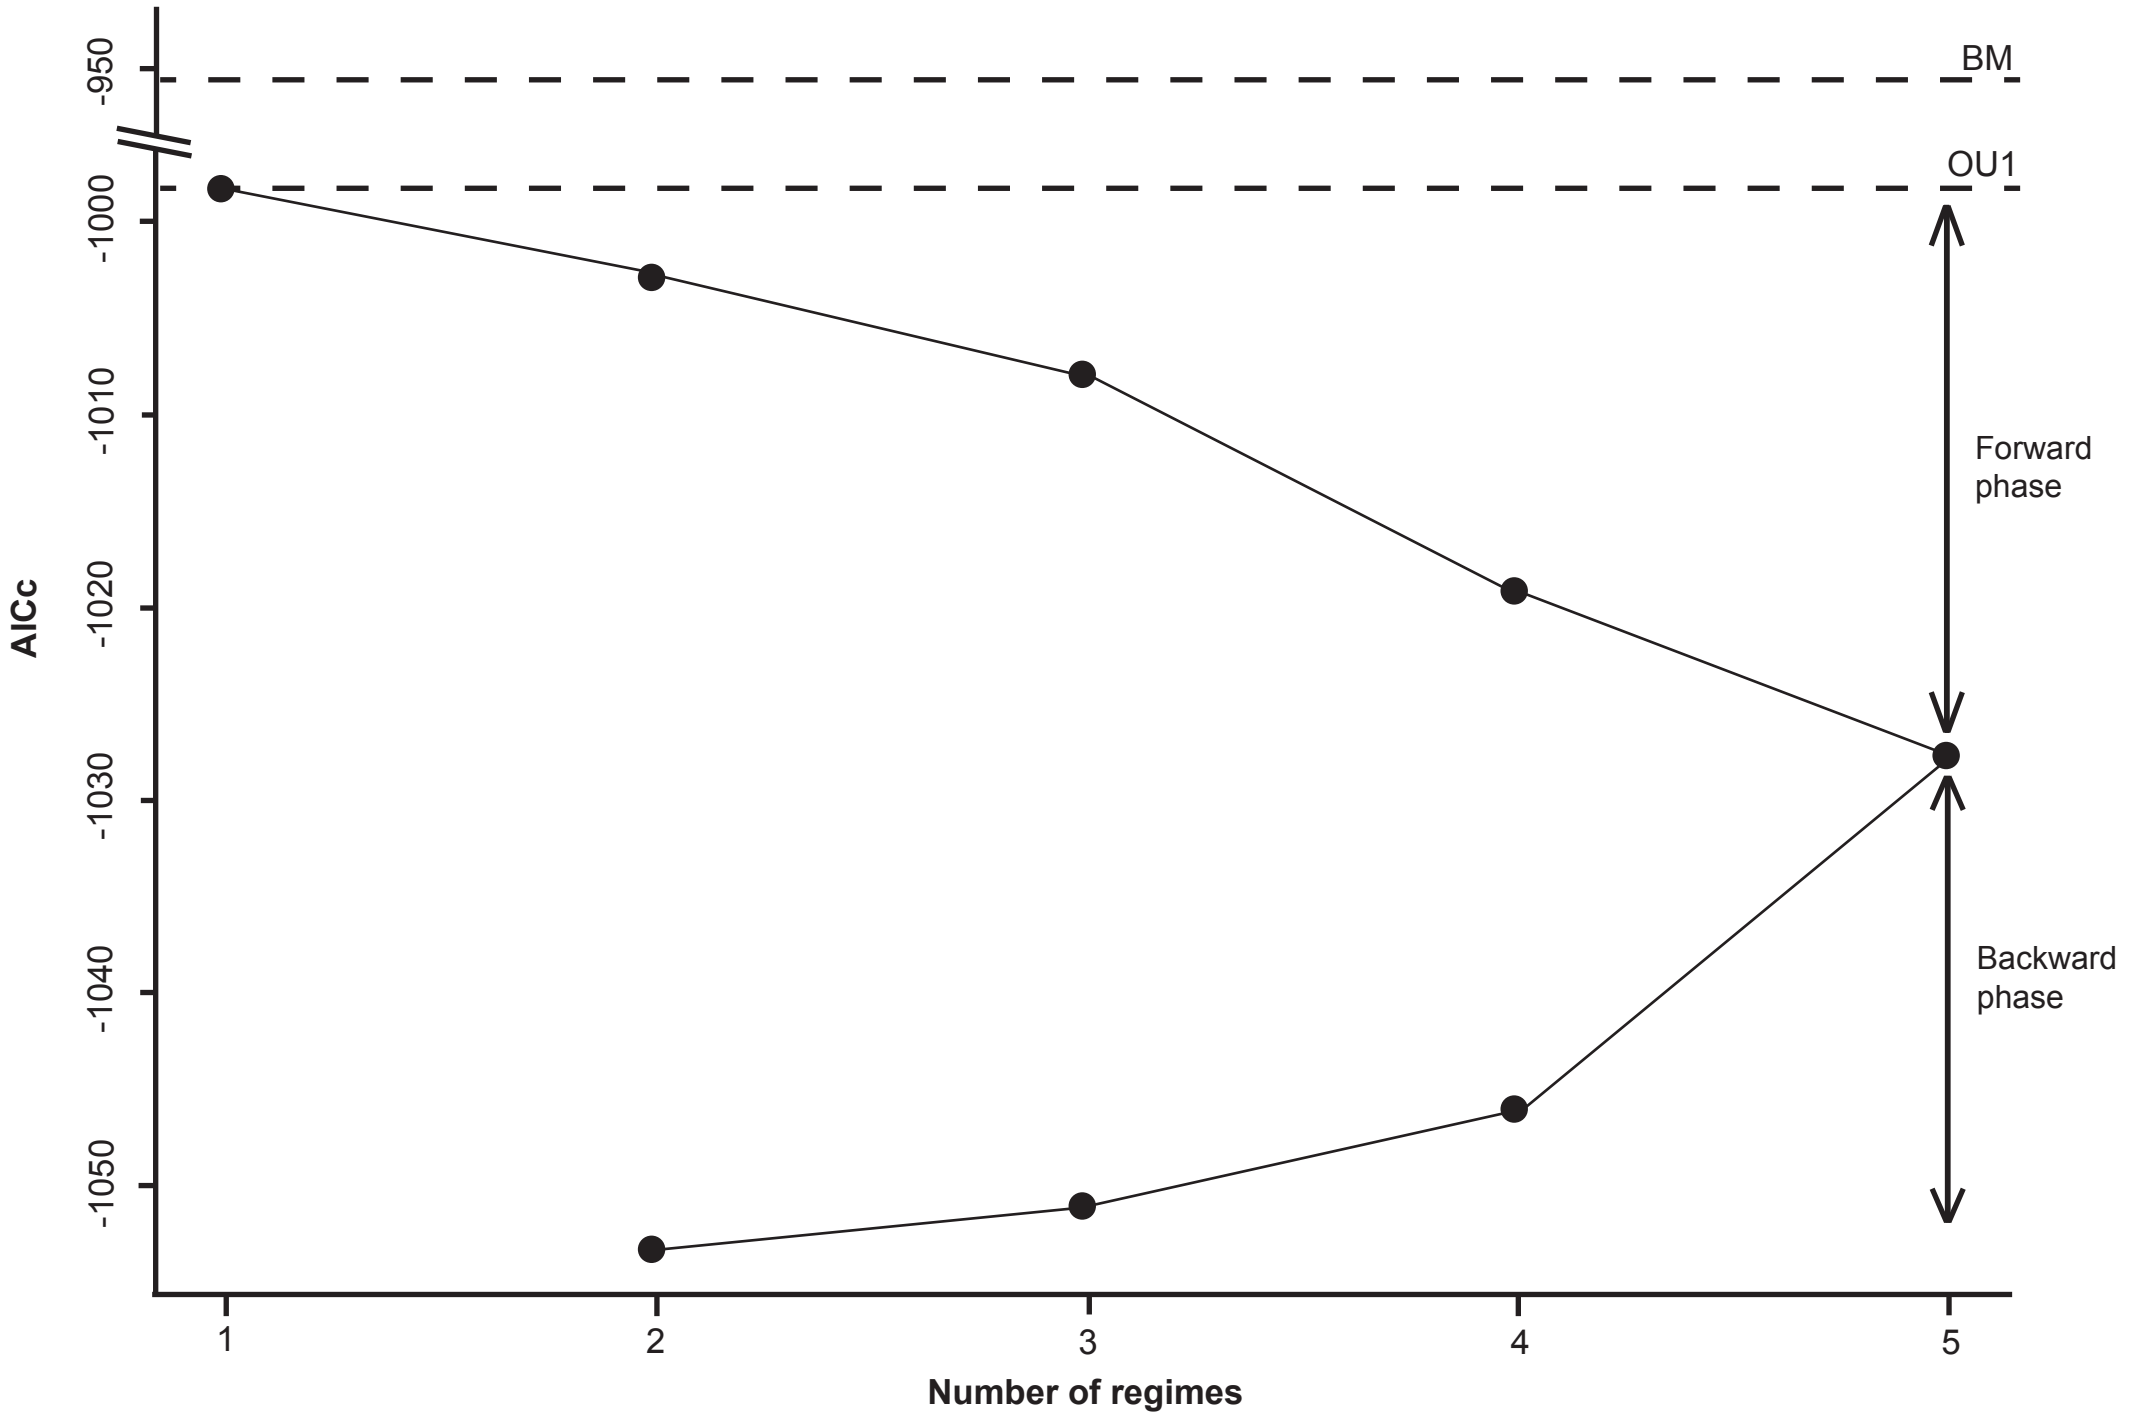

**Supplementary Table 1:** Sample sizes for the morphological analysis, the habitat type each species belongs to and the museum registration number for the individual used for sequence capture and species tree inference (ABTC: Australian Biological Tissue Collection, QM: Queensland Museum and CCM: Moritz' et al. field collection).

| <b>Species</b>           | <b>Sample size</b> | <b>Ecotype</b> | <b>Phylo rep</b> |
|--------------------------|--------------------|----------------|------------------|
| <b>C. plagiocephalus</b> | 27                 | arboreal       | ABTC63597        |
| <b>C. tytthos</b>        | 26                 | arboreal       | ABTC70865        |
| <b>C. ochrus</b>         | 21                 | arboreal       | ABTC29743        |
| <b>C. pannosus</b>       | 61                 | arboreal       | ABTC29754        |
| <b>C. exochus</b>        | 29                 | arboreal       | ABTC67985        |
| <b>C. mertensi</b>       | 23                 | arboreal       | ABTC30122        |
| <b>C. australis</b>      | 98                 | arboreal       | ABTC29749        |
| <b>C. fuhni</b>          | 12                 | saxicolous     | QMJ58845         |
| <b>C. gurrmul</b>        | 13                 | littoral       | ABTC28475        |
| <b>C. l. horneri</b>     | 13                 | littoral       | ABTC29264        |
| <b>C. l. litoralis</b>   | 33                 | littoral       | ABTC30378        |
| <b>C. daedalos</b>       | 15                 | saxicolous     | ABTC70694        |
| <b>C. juno</b>           | 36                 | saxicolous     | CCM1765          |
| <b>C. wulbu</b>          | 11                 | saxicolous     | ABTC72544        |
| <b>C. megastictus</b>    | 9                  | saxicolous     | CCM1178          |
| <b>C. zoticus</b>        | 16                 | saxicolous     | ABTC11972        |
| <b>C. ustulatus</b>      | 28                 | saxicolous     | ABTC29787        |
| <b>C. ruber - A1</b>     | 22                 | arboreal       | ABTC30319        |
| <b>C. ruber - A2</b>     | 5                  | arboreal       | ABTC30156        |
| <b>C. ruber - A3</b>     | 4                  | arboreal       | ABTC28730        |
| <b>C. buchananii</b>     | 44                 | arboreal       | ABTC63616        |
| <b>C. metallicus</b>     | 117                | arboreal       | ABTC30152        |
| <b>C. cygnatus</b>       | 70                 | arboreal       | ABTC29638        |
| <b>C. p. pulcher</b>     | 76                 | arboreal       | ABTC30450        |
| <b>C. virgatus</b>       | 30                 | arboreal       | ABTC30392        |
| <b>C. adamsi</b>         | 24                 | arboreal       | ABTC30376        |

**Supplementary Table 2:** Loadings for the first two components of the phylogenetic principal components analysis (pPCA).

| Character              | pPC1              | pPC2             |
|------------------------|-------------------|------------------|
| Fore limb length       | <b>-.89678899</b> | -.4126609        |
| Hind limb length       | <b>-.85257573</b> | -.4668857        |
| Head depth             | <b>.92359736</b>  | -.3344562        |
| Head width             | .06457198         | <b>-.4855113</b> |
| Snout to eye length    | .18055190         | <b>-.5765652</b> |
| Eye to ear length      | -.07400464        | <b>-.4652479</b> |
| Ear to arm length      | -.51115946        | <b>.6340225</b>  |
| Variance explained (%) | 66.5              | 18.9             |

Note: Boldface indicates traits used to interpret the axes

**Supplementary Table 3:** Disparity indices for each habitat category and between all points combined, based on PC1 species scores.

| Data        | Average squared Euclidean distance |
|-------------|------------------------------------|
| All species | 0.00455420                         |
| Arboreals   | 0.00055221                         |
| Rock        | 0.00130304                         |
| Littoral    | 0.00121110                         |

**Supplementary Table 4:** Estimates of  $\theta$ , phenotypic trait optima, and their standard error, as inferred under the OUM model with OUwie.

| Habitat category | Theta       | S.E.        |
|------------------|-------------|-------------|
| Arboreals        | 0.02909755  | 0.004557275 |
| Rock             | -0.07700898 | 0.007361843 |
| Littoral         | 0.00755553  | 0.01057598  |
